# Supplementary material
Source: PubMed Central journal article supplement (PMC3511602)

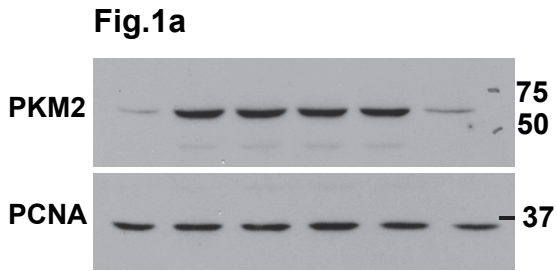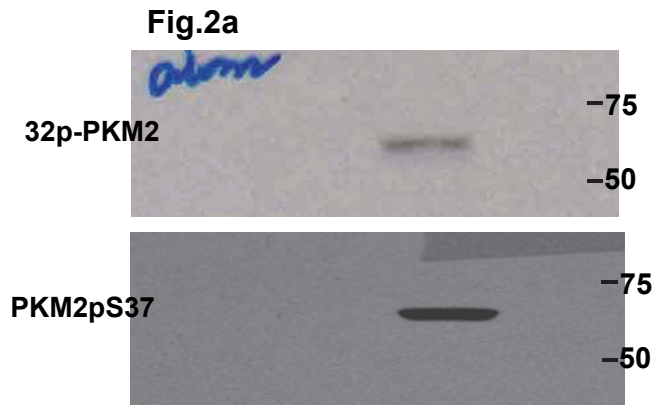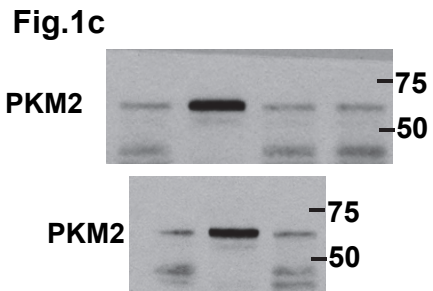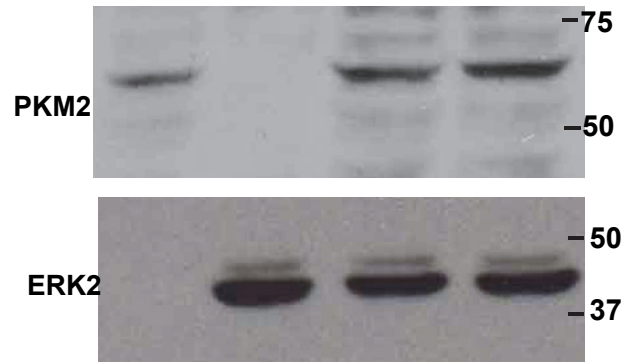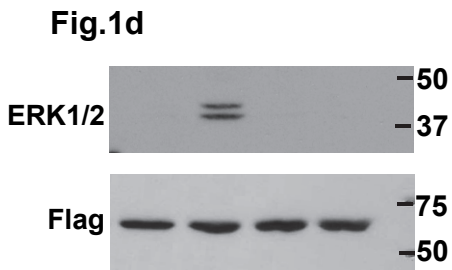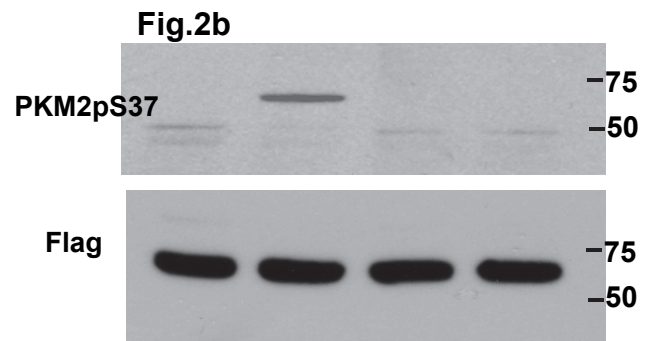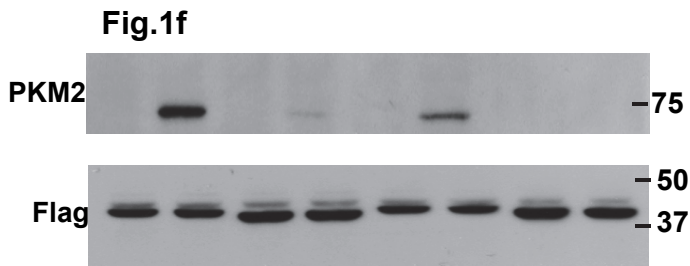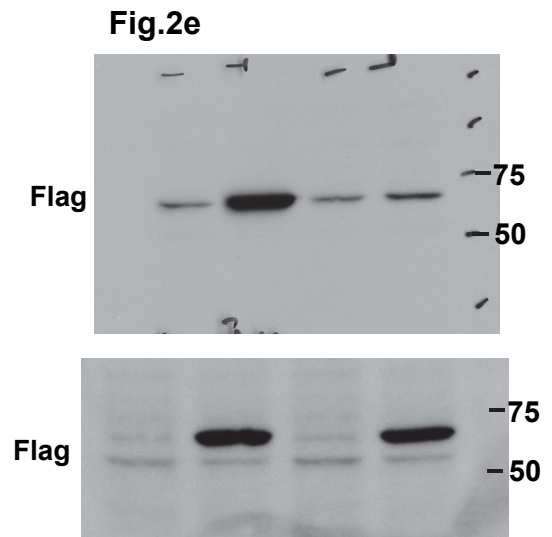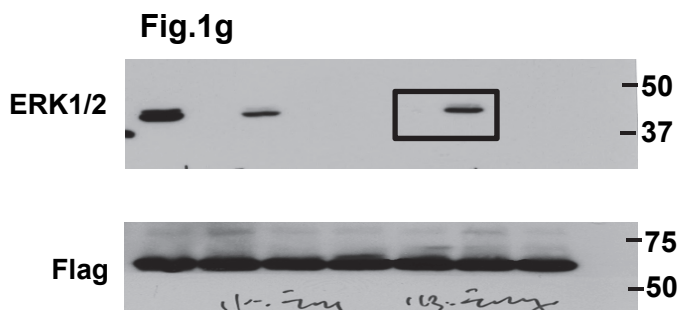

**Fig.3d**

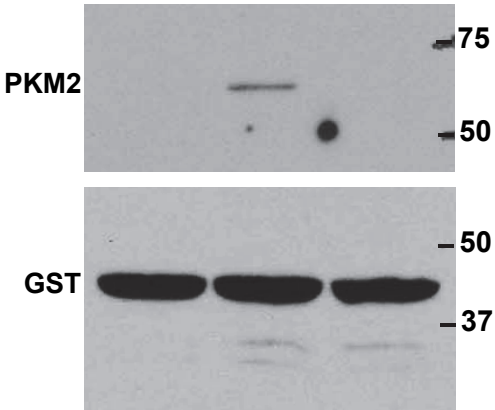

**Fig.3g**

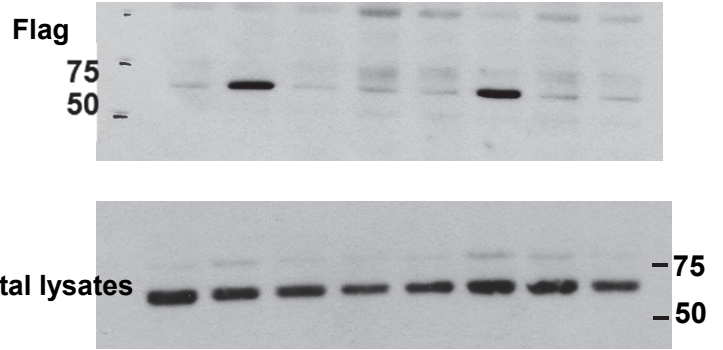

**Fig.2e**

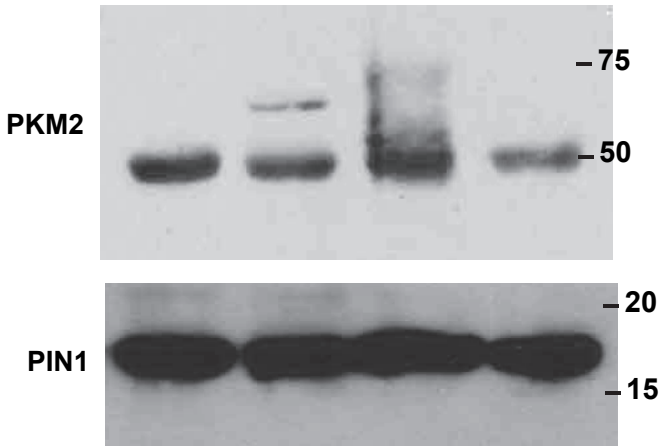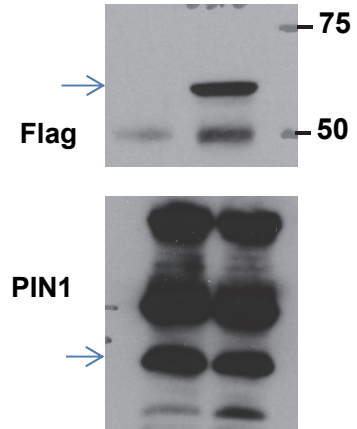

**Fig.4a**

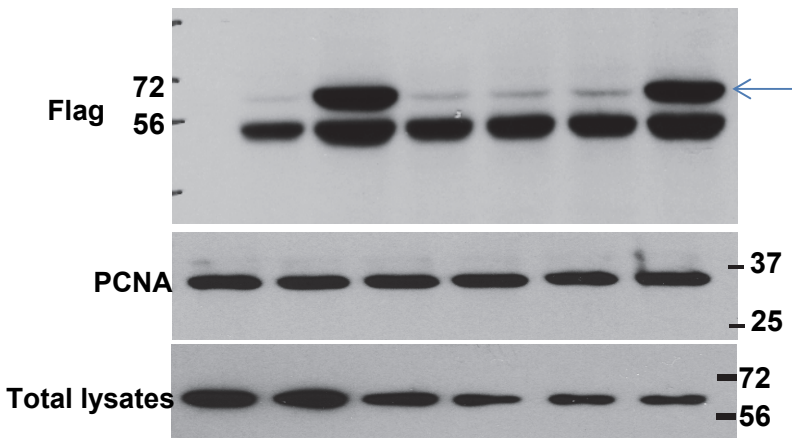

**Fig.4d**

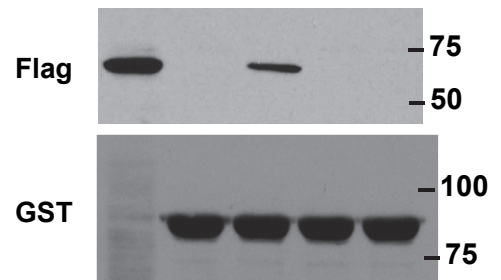

**Fig.5d**

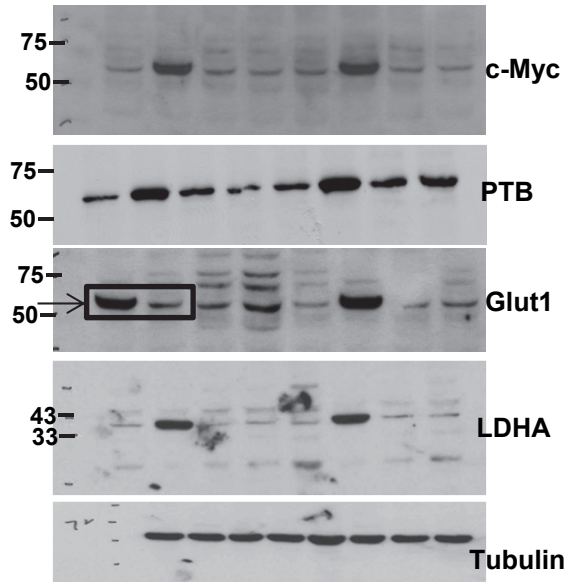

**Fig.5e**

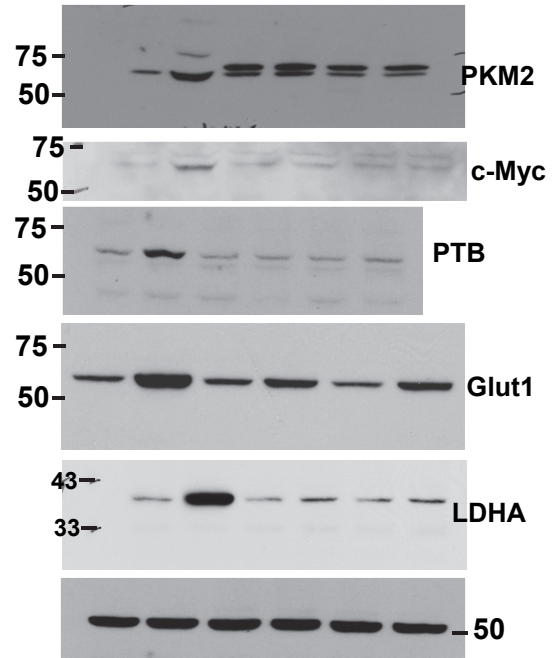

Supplement: NIHMS417383-supplement-10.pdf [file NIHMS417383-supplement-10.pdf]
